# Supplementary material
Source: PubMed Central journal article supplement (PMC5363077)
Supplement: NIHMS851245-supplement-Supplemental.pdf [file NIHMS851245-supplement-Supplemental.pdf]

## Supplementary Online Content

Lipitz-Snyderman A, Sima CS, Atoria CL, et al. Physician-driven variation in nonrecommended services among older adults diagnosed with cancer [published online August 15, 2016]. *JAMA Intern Med*. doi:10.1001/jamainternmed.2016.4426.

**eTable 1.** Nonrecommended service use by select patient characteristics

**eTable 2.** Likelihood of patient receiving service by select patient characteristics

This supplementary material has been provided by the authors to give readers additional information about their work.

**eTable 1.** Nonrecommended service use by select patient characteristics

|                                             | Non-recommended Service Use (%)                    |                                                  |                                                                   |                                                                           |                                                                  |
|---------------------------------------------|----------------------------------------------------|--------------------------------------------------|-------------------------------------------------------------------|---------------------------------------------------------------------------|------------------------------------------------------------------|
|                                             | Imaging for staging in early stage prostate cancer | Imaging for staging in early stage breast cancer | Imaging for post-treatment surveillance in low risk breast cancer | IMRT for whole breast radiotherapy as part of breast conservation therapy | Extended fractionation schemes for palliation of bone metastases |
|                                             | (n=32,093)                                         | (n=89,006)                                       | (n=44,216)                                                        | (n=25,271)                                                                | (n=3,464)                                                        |
| <b>Characteristic</b>                       |                                                    |                                                  |                                                                   |                                                                           |                                                                  |
| All patients                                | 0.40                                               | 0.14                                             | 0.26                                                              | 0.18                                                                      | 0.35                                                             |
| Prior patient received service <sup>1</sup> |                                                    |                                                  |                                                                   |                                                                           |                                                                  |
| Yes                                         | 0.60                                               | 0.28                                             | 0.28                                                              | 0.69                                                                      | 0.41                                                             |
| No                                          | 0.26                                               | 0.12                                             | 0.25                                                              | 0.07                                                                      | 0.32                                                             |
| Age at diagnosis (years)                    |                                                    |                                                  |                                                                   |                                                                           |                                                                  |
| 66-69                                       | 0.40                                               | 0.15                                             | 0.25                                                              | 0.18                                                                      | 0.34                                                             |
| 70-74                                       | 0.40                                               | 0.15                                             | 0.26                                                              | 0.18                                                                      | 0.34                                                             |
| 75-79                                       | 0.40                                               | 0.14                                             | 0.26                                                              | 0.18                                                                      | 0.32                                                             |
| 80-84                                       | 0.39                                               | 0.14                                             | 0.27                                                              | 0.18                                                                      | 0.38                                                             |
| 85+                                         | 0.32                                               | 0.12                                             | 0.26                                                              | 0.17                                                                      | 0.44                                                             |
| Race                                        |                                                    |                                                  |                                                                   |                                                                           |                                                                  |
| White                                       | 0.39                                               | 0.14                                             | 0.26                                                              | 0.18                                                                      | 0.36                                                             |

|                            |      |      |      |      |      |
|----------------------------|------|------|------|------|------|
| Black                      | 0.45 | 0.16 | 0.27 | 0.24 | 0.30 |
| Other                      | 0.39 | 0.15 | 0.22 | 0.09 | 0.35 |
| Region                     |      |      |      |      |      |
| Northeast                  | 0.53 | 0.19 | 0.28 | 0.17 | 0.31 |
| South                      | 0.38 | 0.11 | 0.27 | 0.28 | 0.38 |
| Midwest                    | 0.42 | 0.16 | 0.25 | 0.30 | 0.33 |
| West                       | 0.31 | 0.13 | 0.24 | 0.11 | 0.37 |
| AJCC Stage <sup>2</sup>    |      |      |      |      |      |
| In-situ                    | NA   | 0.05 | 0.22 | NA   | NA   |
| I                          | 0.39 | 0.13 | 0.27 | 0.18 | 0.32 |
| II                         | 0.42 | 0.22 | NA   | 0.17 | 0.34 |
| III                        | NA   | NA   | NA   | NA   | 0.38 |
| IV                         | NA   | NA   | NA   | NA   | 0.38 |
| Unknown                    | NA   | NA   | NA   | NA   | 0.42 |
| Charlson comorbidity score |      |      |      |      |      |
| 0                          | 0.39 | 0.13 | 0.23 | 0.18 | 0.36 |
| 1                          | 0.41 | 0.15 | 0.30 | 0.18 | 0.36 |
| 2+                         | 0.42 | 0.17 | 0.36 | 0.19 | 0.31 |

<sup>1</sup>Applies to patients whose physicians had a prior patient.

<sup>2</sup>For prostate cancer services, we used clinical T staging.

**eTable 2.** Likelihood of patient receiving service by select patient characteristics

|                                 | <b>Adjusted Odds Ratio<sup>1</sup></b><br>[95% Confidence Interval) |                                                  |                                                                   |                                                                           |                                                                  |
|---------------------------------|---------------------------------------------------------------------|--------------------------------------------------|-------------------------------------------------------------------|---------------------------------------------------------------------------|------------------------------------------------------------------|
|                                 | Imaging for staging in early stage prostate cancer                  | Imaging for staging in early stage breast cancer | Imaging for post-treatment surveillance in low risk breast cancer | IMRT for whole breast radiotherapy as part of breast conservation therapy | Extended fractionation schemes for palliation of bone metastases |
| <b>Prior patient</b>            |                                                                     |                                                  |                                                                   |                                                                           |                                                                  |
| Did not receive service         | Ref                                                                 | Ref                                              | Ref                                                               | Ref                                                                       | Ref                                                              |
| Did receive service             | 3.90 [3.71-4.10]                                                    | 3.02 [2.88-3.17]                                 | 1.12 [1.07-1.18]                                                  | 24.91 [22.86-27.15]                                                       | 1.48 [1.26-1.75]                                                 |
| <b>Age at diagnosis (years)</b> |                                                                     |                                                  |                                                                   |                                                                           |                                                                  |
| 66-69                           | Ref                                                                 | Ref                                              | Ref                                                               | Ref                                                                       | Ref                                                              |
| 70-74                           | 0.96 [0.91-1.03]                                                    | 0.96 [0.91-1.02]                                 | 1.08 [1.01-1.14]                                                  | 0.97 [0.87-1.09]                                                          | 1.03 [0.82-1.31]                                                 |
| 75-79                           | 0.96 [0.89-1.04]                                                    | 0.85 [0.80-0.91]                                 | 1.01 [0.95-1.08]                                                  | 0.97 [0.86-1.09]                                                          | 0.85 [0.66-1.09]                                                 |
| 80-84                           | 1.02 [0.92-1.13]                                                    | 0.77 [0.72-0.82]                                 | 1.03 [0.96-1.11]                                                  | 0.95 [0.83-1.09]                                                          | 1.03 [0.79-1.35]                                                 |
| 85+                             | 0.80 [0.68-0.94]                                                    | 0.60 [0.56-0.65]                                 | 1.00 [0.91-1.10]                                                  | 0.89 [0.72-1.09]                                                          | 1.39 [1.01-1.91]                                                 |
| <b>Race</b>                     |                                                                     |                                                  |                                                                   |                                                                           |                                                                  |
| White                           | Ref                                                                 | Ref                                              | Ref                                                               | Ref                                                                       | Ref                                                              |
| Black                           | 1.13 [1.04-1.18]                                                    | 1.01 [0.93-1.10]                                 | 0.90 [0.81-0.98]                                                  | 1.09 [0.92-1.30]                                                          | 0.75 [0.56-1.00]                                                 |
| Other                           | 1.13 [1.02-1.26]                                                    | 1.03 [0.94-1.13]                                 | 0.83 [0.74-0.92]                                                  | 0.73 [0.58-0.94]                                                          | 0.99 [0.73-1.36]                                                 |
| <b>Region</b>                   |                                                                     |                                                  |                                                                   |                                                                           |                                                                  |
| Northeast                       | Ref                                                                 | Ref                                              | Ref                                                               | Ref                                                                       | Ref                                                              |
| South                           | 0.60 [0.56-0.64]                                                    | 0.51 [0.48-0.54]                                 | 0.97 [0.91-1.04]                                                  | 1.83 [1.62-2.08]                                                          | 1.34 [1.03-1.76]                                                 |
| Midwest                         | 0.70 [0.63-0.77]                                                    | 0.77 [0.72-0.83]                                 | 0.91 [0.84-0.98]                                                  | 1.95 [1.69-2.24]                                                          | 1.17 [0.88-1.57]                                                 |
| West                            | 0.50 [0.47-0.54]                                                    | 0.64 [0.61-0.67]                                 | 0.86 [0.81-0.92]                                                  | 0.71 [0.63-0.80]                                                          | 1.26 [1.01-1.57]                                                 |
| <b>AJCC Stage<sup>2</sup></b>   |                                                                     |                                                  |                                                                   |                                                                           |                                                                  |
| In-situ                         | NA                                                                  | Ref                                              | Ref                                                               | NA                                                                        | NA                                                               |
| I                               | Ref                                                                 | 2.99 [2.74-3.28]                                 | 1.38 [1.28-1.48]                                                  | Ref                                                                       | Ref                                                              |
| II                              | 1.01 [0.94-1.10]                                                    | 3.93 [3.52-4.39]                                 | NA                                                                | 0.92 [0.82-1.03]                                                          | 0.92 [0.75-1.12]                                                 |
| III                             | NA                                                                  | NA                                               | NA                                                                | NA                                                                        | 1.09 [0.78-1.53]                                                 |
| IV                              | NA                                                                  | NA                                               | NA                                                                | NA                                                                        | 1.12 [0.80-1.57]                                                 |
| Unknown                         | NA                                                                  | NA                                               | NA                                                                | NA                                                                        | NA                                                               |

| Charlson comorbidity score |                  |                  |                  |                  |                  |
|----------------------------|------------------|------------------|------------------|------------------|------------------|
| 0                          | Ref              | Ref              | Ref              | Ref              | Ref              |
| 1                          | 1.11 [1.04-1.18] | 1.09 [1.03-1.14] | 1.43 [1.36-1.51] | 0.93 [0.83-1.03] | 1.03 [0.84-1.27] |
| 2+                         | 1.17 [1.08-1.27] | 1.20 [1.13-1.27] | 1.92 [1.79-2.05] | 0.91 [0.79-1.10] | 0.87 [0.68-1.12] |

<sup>†</sup>Likelihood of patient receiving imaging; logistic model. Adjusted for: age, race, a modified Charlson comorbidity index, marital status, median income of Census tract of residence, geographic region, metropolitan location, stage, year of diagnosis, treatment, tumor characteristics.
